# Supplementary material
Source: publisher figshare collection journal article supplement (https://rs.figshare.com/ndownloader/files/23890637)
Supplement: Supplementary file 1 [file 23890637]

---

# Knot polynomials of open and closed curves - Supplementary Information

Eleni Panagiotou<sup>\*,\*</sup> and Louis H. Kauffman<sup>§</sup>

<sup>#</sup>Department of Mathematics and SimCenter, University of Tennessee at Chattanooga, TN 37403, USA, <eleni-panagiotou@utc.edu>

<sup>§</sup>Department of Mathematics, Statistics and Computer Science University of Illinois at Chicago Chicago, IL 60607-7045, USA and Department of Mechanics and Mathematics Novosibirsk State University Novosibirsk Russia <kauffman@uic.edu>

---

## 1 A finite form for the bracket polynomial of a polygonal curve with 4 edges

In this section we show that an equivalent finite form of bracket polynomial exists, reducing the computation of the integral to a computation of a few dot and cross products between vectors and some arcsin evaluations. Here we provide a finite form of the bracket polynomial for a polygonal curve of 4 edges. This could lead to the creation of its finite form for more edges.

### 1.1 Closed curves

The first non-trivial bracket polynomial of a closed polygonal curve is that of a polygon of 4 edges, since a polygon of 3 edges is a triangle in 3-space and all projections give a diagram of no crossings except a set of measure zero which corresponds to irregular projections. Let  $P_4$  denote a polygon of 4 edges,  $e_1, e_2, e_3, e_4$  that connect the vertices  $(0, 1), (1, 2), (2, 3)$  and  $(3, 0)$ , respectively. Let  $\epsilon_{i,j}$  denote the sign of the crossing between the projections of the edges  $e_i, e_j$  when they cross. Notice that  $\epsilon_{i,j}$  is independent of the projection direction and can take the values 1 and -1.

**Proposition 1.1.** *The bracket polynomial of a polygon of 4 edges,  $e_1, e_2, e_3, e_4$ , in 3-space,  $P_4$ , is equal to:*

$$\langle P_4 \rangle = 2|L(e_1, e_3)|(-A^{3\epsilon_{1,3}}) + 2|L(e_2, e_4)|(-A^{3\epsilon_{2,4}}) + (1 - ACN(P_4)) \quad (1)$$

where  $L$  denotes the Gauss linking integral and  $ACN$  denotes the average crossing number.

*Proof.* In any projection direction there are 3 possible diagrams that may occur as a projection of  $P_4$ : a diagram with no crossing, or a crossing between the projections of  $e_1, e_3$  or a crossing between the projections of  $e_2, e_4$ . Notice that not both crossings at the same diagram are possible (the line defined by the projection of  $e_1$  cuts the plane in two regions. Since the projection of  $e_3$  intersects the projection of  $e_1$ , the projections of the vertices 2 and 3 lie in different regions. Since  $e_2$  joins vertex 1 with 2 and  $e_4$  joins vertex 3 with 0,  $e_2, e_4$  lie in different regions, thus they cannot cross.) In the case where there is no crossing, the bracket polynomial of that projection is equal to 1. When there is a crossing, the bracket polynomial is equal to  $-A^{\pm 3}$ , where the sign of the exponent is determined

by the sign of the crossing in the projection. Since the probability of  $e_2, e_4$  crossing is equal to  $2|L(e_2, e_4)|$  and the probability of  $e_1, e_3$  crossing is  $2|L(e_1, e_3)|$ , then the bracket polynomial is

$$\langle P_4 \rangle = 2|L(e_1, e_3)|(-A^{3\epsilon_{1,3}}) + 2|L(e_2, e_4)|(-A^{3\epsilon_{2,4}}) + (1 - ACN(P_4)) \quad (2)$$

where we used the fact that  $ACN(P_4) = 2|L(e_1, e_3)| + 2|L(e_2, e_4)|$ . Notice that, due to the connectivity of the polygonal curve,  $\epsilon_{1,3} = -\epsilon_{2,4}$ , thus Eq. 2 could be expressed as

$$\langle P_4 \rangle = 2|L(e_1, e_3)|(-A^{3\epsilon_{1,3}}) + 2|L(e_2, e_4)|(-A^{-3\epsilon_{1,3}}) + (1 - ACN(P_4))$$

□

## 1.2 Open curves

In the case of a polygonal curve with 3 edges, we denote  $E_3$ , the Kauffman bracket polynomial is always trivial, but the writhe of a diagram of a projection of  $E_3$  can be 0 or  $\pm 1$ , depending on whether  $e_1, e_3$  cross when projected in a direction  $\xi$ .

**Proposition 1.2.** *Let  $E_3$  denote a polygonal curve of 3 edges,  $e_1, e_2, e_3$  in 3-space, then the bracket polynomial of  $E_3$  is*

$$\langle E_3 \rangle = 2|L(e_1, e_3)|(-A^3)^{\epsilon_{1,3}} + (1 - 2|L(e_1, e_3)|)$$

where  $\epsilon_{1,3}$  is the sign of  $L(e_1, e_3)$

*Proof.* Consider a polygonal curve of 3 edges  $e_1, e_2, e_3$ , ( $E_3$ ). Then in a projection of  $E_3$ ,  $(E_3)_{\bar{\xi}}$ , one either sees no crossings, so  $\langle (E_3)_{\bar{\xi}} \rangle = 1$ , or there is a crossing between  $e_1$  and  $e_3$ , in which case  $\langle (E_3)_{\bar{\xi}} \rangle = -A^{\epsilon_{1,3}}$ , thus

$$\begin{aligned} \langle E_3 \rangle &= p_{k0,0}^{(3)} + p_{k0,\epsilon_{1,3}}^{(3)}(-A^3)^{\epsilon_{1,3}} \\ &= (1 - 2|L(e_1, e_3)|) + 2|L(e_1, e_3)|(-A^3)^{\epsilon_{1,3}} \end{aligned}$$

where  $p_{k0,0}^{(3)} = P(K((E_3)_{\bar{\xi}}) = k0, wr((E_3)_{\bar{\xi}}) = 0)$  and  $p_{k0,\epsilon_{1,3}}^{(3)} = P(K((E_3)_{\bar{\xi}}) = k0, wr((E_3)_{\bar{\xi}}) = \epsilon_{1,3})$ . □

Let  $E_4$  be composed by 4 edges,  $e_1, e_2, e_3, e_4$ , connecting the vertices  $(0, 1), (1, 2), (2, 3), (3, 4)$ , respectively.

Let  $E_4$  denote a polygonal curve of 4 edges. Then, by Propositions A.1 and A.2 (in main manuscript), the only non-trivial bracket polynomial is  $k2.1$  and the writhe of the diagram is either 2 or -2. All the possible writhe values in a  $k0$  (trivial knotoid) diagram of  $E_4$  can be determined by inspection of all the possible diagrams of a polygonal curve of 4 edges, given in Proposition A.1. Let us denote these diagrams as  $k0_{A_1}, k0_{A_2}, k0_{A_3}, k0_{B_i}, k0_{B_{ii}}, k0_{B_{iii}}, k0_{B_{iiii}}, k0_C$ . Let us denote by  $wr$  the writhe of a diagram. Then one can see that  $wr(k0_{A_1}) = \pm 1, wr(k0_{A_2}) = \pm 1, wr(k0_{A_3}) = \pm 1, wr(k0_{B_i}) = 0$  or  $\pm 2, wr(k0_{B_{ii}}) = 0$  or  $\pm 2, wr(k0_{B_{iii}}) = 0$  or  $\pm 2, wr(k0_{B_{iiii}}) = 0$  or  $\pm 2, wr(k0_C) = \pm 1$ . Thus the bracket polynomial of  $E_4$  has the following form:

$$\begin{aligned}
\langle E_4 \rangle &= p_{k2.1}^{(4)} \langle k2.1 \rangle + \sum_{j=-2}^2 p_{k0,j}^{(4)} (-A^3)^j \\
&= p_{k2.1}^{(4)} (A^2 - A^{-4} + 1) + \sum_{j=-2}^2 p_{k0,j}^{(4)} (-A^3)^j
\end{aligned}$$

where  $p_{k2.1}^{(4)} = P(K((E_4)_{\bar{\xi}}) = k2.1)$  denotes the geometric probability that a projection of  $E_4$  gives the non-trivial knotoid  $k2.1$  (obtained in Theorem A.2 in main manuscript) and where  $p_{k0,j}^{(4)} = P(K((E_4)_{\bar{\xi}}) = k0, wr((E_4)_{\bar{\xi}}) = j)$  denotes the probability of obtaining a diagram of the trivial knotoid with writhe  $j$ . The rest of this section is focused on obtaining finite forms for these probabilities.

**Theorem 1.1.** *Let  $E_4$  denote a polygonal curve of 4 edges,  $e_1, e_2, e_3, e_4$  in 3-space, then the bracket polynomial of  $E_4$  is*

$$\begin{aligned}
\langle E_4 \rangle &= p_{k2.1}^{(4)} \langle k2.1 \rangle + p_{k0,\epsilon_{2,4}}^{(4)} (-A^3)^{\epsilon_{2,4}} + p_{k0,-\epsilon_{2,4}}^{(4)} (-A^3)^{-\epsilon_{2,4}} + p_{k0,-2\epsilon_{2,4}}^{(4)} (-A^3)^{-2\epsilon_{2,4}} \\
&\quad + p_{k0,2\epsilon_{2,4}}^{(4)} (-A^3)^{2\epsilon_{2,4}} + p_{k0,0}^{(4)}
\end{aligned}$$

where the coefficients are:

$$p_{k2.1}^{(4)} = \begin{cases} \frac{1}{2\pi} A(Q), & \text{if } \epsilon_{1,3} = \epsilon_{1,4} \\ 0, & \text{otherwise} \end{cases} \quad (3)$$

$$p_{k0,\epsilon_{2,4}}^{(4)} = \begin{cases} 2|L(e_2, e_4)| - \frac{1}{2\pi} A(Q_{4,2,1}), & \epsilon_{1,3} = \epsilon_{1,4} \\ 2|L(e_2, e_4)| + 2|L(e_1, e_4)| - \frac{1}{2\pi} (A(Q_{4,2,1}) + A(Q_2) + A(Q_1)), & \text{if } \epsilon_{2,4} = \epsilon_{1,4} = -\epsilon_{1,3} \\ 2|L(e_2, e_4)| + 2|L(e_1, e_3)| - \frac{1}{2\pi} (A(Q_{4,2,1}) + A(Q_1)), & \text{if } \epsilon_{2,4} = \epsilon_{1,3} = -\epsilon_{1,4} \end{cases} \quad (4)$$

$$p_{k0,-\epsilon_{2,4}}^{(4)} = \begin{cases} 2|L(e_1, e_3)| + 2|L(e_1, e_4)| - \frac{1}{2\pi} (A(Q_{1,3,4}) + A(Q_2) + A(Q_1)), & \epsilon_{1,3} = \epsilon_{1,4} \\ 2|L(e_1, e_3)| - \frac{1}{2\pi} A(Q_{1,3,4}), & \text{if } \epsilon_{2,4} = \epsilon_{1,4} = -\epsilon_{1,3} \\ 2|L(e_1, e_4)| - \frac{1}{2\pi} (A(Q_{1,3,4}) + A(Q_2)), & \text{if } \epsilon_{2,4} = \epsilon_{1,3} = -\epsilon_{1,4} \end{cases} \quad (5)$$

$$p_{k0,2\epsilon_{2,4}}^{(4)} = \begin{cases} \frac{1}{2\pi} (A(Q_2) - A(Q)), & \text{if } \epsilon_{2,4} = \epsilon_{1,4} = -\epsilon_{1,3} \\ 0, & \text{otherwise} \end{cases} \quad (6)$$

$$p_{k0,-2\epsilon_{2,4}}^{(4)} = \begin{cases} \frac{1}{2\pi}(A(Q_1) - A(Q)), & \text{if } \epsilon_{1,4} = \epsilon_{1,3} = -\epsilon_{2,3} \\ 0, & \text{otherwise} \end{cases} \quad (7)$$

and

$$p_{k0,0}^{(4)} = 1 - p_{k0,-2\epsilon_{2,4}}^{(4)} + p_{k0,2\epsilon_{2,4}}^{(4)} + p_{k0,-\epsilon_{2,4}}^{(4)} + p_{k0,\epsilon_{2,4}}^{(4)} + p_{k2,1,-\epsilon_{2,4}}^{(4)} \quad (8)$$

where  $\epsilon_{i,j}$  denotes the sign of the linking number between  $e_i, e_j$ ,  $Q_1 = Q_{1,3,4} \setminus Q_{2,4}$ ,  $Q_2 = Q_{4,2,1} \setminus Q_{1,3}$  and  $Q = Q((E_4)_{\xi} = k2.1)$ .  $P(Q)$  is derived in Theorem A.2 (in main manuscript) and  $Q_1$  is shown in Table 1.  $Q_{4,2,1}$ ,  $Q_2$  are derived with the same formulas for the reversed polygonal curve.

*Proof.* In the following, for simplicity, we will write  $P(A_1)$  to express the probability  $P(K((E_4)_{\xi}) = k0_{A_1})$ , etc.

By Proposition A.2 (in main manuscript),  $k2.1$  is a possible knotoid diagram only when  $\epsilon_{1,3} = \epsilon_{1,4}$ , in which case, it also implies that  $\epsilon_{2,4} = -\epsilon_{1,3}$ . The probability of obtaining  $k2.1$  is found in Theorem A.2 (in main manuscript).

Thus, we only need to examine the probabilities of obtaining the trivial knotoid with a given writhe. By inspection of the diagrams shown in Figure 6 (in main manuscript), we first notice the following:

$$p_{k0,\epsilon_{2,4}}^{(4)} = \begin{cases} P(A_2), & \text{if } \epsilon_{1,3} = \epsilon_{1,4} = -\epsilon_{2,4} \\ P(A_3) + P(A_2) + P(C), & \text{if } \epsilon_{2,4} = \epsilon_{1,4} = -\epsilon_{1,3} \\ P(A_1) + P(A_2) + P(C), & \text{if } \epsilon_{2,4} = \epsilon_{1,3} = -\epsilon_{1,4} \end{cases} \quad (9)$$

$$p_{k0,-\epsilon_{2,4}}^{(4)} = \begin{cases} P(A_1) + P(A_3) + P(C), & \text{if } \epsilon_{1,3} = \epsilon_{1,4} = -\epsilon_{2,4} \\ P(A_1), & \text{if } \epsilon_{2,4} = \epsilon_{1,4} = -\epsilon_{1,3} \\ P(A_3), & \text{if } \epsilon_{2,4} = \epsilon_{1,3} = -\epsilon_{1,4} \end{cases} \quad (10)$$

$$p_{k0,2\epsilon_{2,4}}^{(4)} = \begin{cases} P(B_{ii}) + P(B_{ii}'), & \text{if } \epsilon_{2,4} = \epsilon_{1,4} = -\epsilon_{1,3} \\ 0, & \text{otherwise} \end{cases} \quad (11)$$

$$p_{k0,-2\epsilon_{2,4}}^{(4)} = \begin{cases} P(B_i) + P(B_i'), & \text{if } \epsilon_{1,3} = -\epsilon_{1,4} = -\epsilon_{2,4} \\ 0, & \text{otherwise} \end{cases} \quad (12)$$

We will compute these probabilities in the three cases:  $\epsilon_{1,3} = \epsilon_{1,4}$ ,  $\epsilon_{1,3} = -\epsilon_{1,4} = \epsilon_{2,4}$ ,  $\epsilon_{1,3} = -\epsilon_{1,4} = -\epsilon_{2,4}$ .

First, we notice that, in all cases, due to the connectivity of the polygonal curve,

|                                                              |                                                                         |                                                                                |
|--------------------------------------------------------------|-------------------------------------------------------------------------|--------------------------------------------------------------------------------|
| $\epsilon_{1,3} = \epsilon_{1,4}, w < 0, w_0 < 0$            | $Q_{1,3,4}$                                                             | $Q_1$                                                                          |
| $c_{3,1} > 0, c_{4,1} > 0, c_{3,0} > 0, c_{4,0} > 0$         | $(\vec{n}_4, \vec{n}_1, -\vec{u}_2, \vec{n}_3)$                         | $(\vec{n}_4, -\vec{v}_3, -\vec{u}_2, \vec{n}_3) \cup Q$                        |
| $c_{3,1} > 0, c_{4,1} > 0, c_{3,0} < 0, c_{4,0} < 0$         | $(\vec{n}_4, \vec{n}_1, -\vec{u}_2, -\vec{u}_1)$                        | $(\vec{n}_4, -\vec{v}_3, -\vec{u}_2, -\vec{u}_1) \cup Q$                       |
| $c_{3,1} > 0, c_{4,1} > 0, c_{3,0} > 0, c_{4,0} < 0$         | $(\vec{n}_4, \vec{n}_1, -\vec{u}_2, -\vec{u}_1, \vec{n}_3)$             | $(\vec{n}_4, -\vec{v}_3, -\vec{u}_2, -\vec{u}_1, \vec{n}_3) \cup Q$            |
| $c_{3,1} > 0, c_{4,1} > 0, c_{3,0} < 0, c_{4,0} > 0$         | $(\vec{n}_4, \vec{n}_1, -\vec{u}_2, \vec{n}_3, -\vec{u}_1)$             | $(\vec{n}_4, -\vec{v}_3, -\vec{u}_2, \vec{n}_3, -\vec{u}_1) \cup Q$            |
| $c_{3,1} < 0, c_{4,1} < 0, c_{3,0} > 0, c_{4,0} > 0$         | $(\vec{n}_4, -\vec{u}_3, -\vec{u}_2, \vec{n}_3)$                        | $(\vec{n}_4, -\vec{v}_3, -\vec{u}_2, \vec{n}_3) \cup Q$                        |
| $c_{3,1} < 0, c_{4,1} < 0, c_{3,0} < 0, c_{4,0} < 0$         | $(\vec{n}_4, -\vec{u}_3, -\vec{u}_2, -\vec{u}_1)$                       | $(\vec{n}_4, -\vec{v}_3, -\vec{u}_2, -\vec{u}_1) \cup Q$                       |
| $c_{3,1} < 0, c_{4,1} < 0, c_{3,0} > 0, c_{4,0} < 0$         | $(\vec{n}_4, -\vec{u}_3, -\vec{u}_2, -\vec{u}_1, \vec{n}_3)$            | $(\vec{n}_4, -\vec{v}_3, -\vec{u}_2, -\vec{u}_1, \vec{n}_3) \cup Q$            |
| $c_{3,1} < 0, c_{4,1} < 0, c_{3,0} < 0, c_{4,0} > 0$         | $(\vec{n}_4, -\vec{u}_3, -\vec{u}_2, \vec{n}_3, -\vec{u}_1)$            | $(\vec{n}_4, -\vec{v}_3, -\vec{u}_2, \vec{n}_3, -\vec{u}_1) \cup Q$            |
| $c_{3,1} > 0, c_{4,1} < 0, c_{3,0} > 0, c_{4,0} > 0$         | $(\vec{n}_4, \vec{n}_1, -\vec{u}_3, -\vec{u}_2, \vec{n}_3)$             | $(\vec{n}_4, -\vec{v}_3, -\vec{u}_2, \vec{n}_3) \cup Q$                        |
| $c_{3,1} > 0, c_{4,1} < 0, c_{3,0} < 0, c_{4,0} < 0$         | $(\vec{n}_4, \vec{n}_1, -\vec{u}_3, -\vec{u}_2, -\vec{u}_1)$            | $(\vec{n}_4, -\vec{v}_3, -\vec{u}_2, -\vec{u}_1) \cup Q$                       |
| $c_{3,1} > 0, c_{4,1} < 0, c_{3,0} > 0, c_{4,0} < 0$         | $(\vec{n}_4, \vec{n}_1, -\vec{u}_3, -\vec{u}_2, -\vec{u}_1, \vec{n}_3)$ | $(\vec{n}_4, -\vec{v}_3, -\vec{u}_2, -\vec{u}_1, \vec{n}_3) \cup Q$            |
| $c_{3,1} > 0, c_{4,1} < 0, c_{3,0} < 0, c_{4,0} > 0$         | $(\vec{n}_4, \vec{n}_1, -\vec{u}_3, -\vec{u}_2, \vec{n}_3, -\vec{u}_1)$ | $(\vec{n}_4, -\vec{v}_3, -\vec{u}_2, \vec{n}_3, -\vec{u}_1) \cup Q$            |
| $c_{3,1} < 0, c_{4,1} > 0, c_{3,0} > 0, c_{4,0} > 0$         | $(\vec{n}_4, -\vec{u}_3, \vec{n}_1, -\vec{u}_2, \vec{n}_3)$             | $(\vec{n}_4, -\vec{v}_3, -\vec{u}_2, \vec{n}_3) \cup Q$                        |
| $c_{3,1} < 0, c_{4,1} > 0, c_{3,0} < 0, c_{4,0} < 0$         | $(\vec{n}_4, -\vec{u}_3, \vec{n}_1, -\vec{u}_2, -\vec{u}_1)$            | $(\vec{n}_4, -\vec{v}_3, -\vec{u}_2, -\vec{u}_1) \cup Q$                       |
| $c_{3,1} < 0, c_{4,1} > 0, c_{3,0} > 0, c_{4,0} < 0$         | $(\vec{n}_4, -\vec{u}_3, \vec{n}_1, -\vec{u}_2, -\vec{u}_1, \vec{n}_3)$ | $(\vec{n}_4, -\vec{v}_3, -\vec{u}_2, -\vec{u}_1, \vec{n}_3) \cup Q$            |
| $c_{3,1} < 0, c_{4,1} > 0, c_{3,0} < 0, c_{4,0} > 0$         | $(\vec{n}_4, -\vec{u}_3, \vec{n}_1, -\vec{u}_2, \vec{n}_3, -\vec{u}_1)$ | $(\vec{n}_4, -\vec{v}_3, -\vec{u}_2, \vec{n}_3, -\vec{u}_1) \cup Q$            |
| $\epsilon_{1,3} = \epsilon_{1,4}, w > 0 \text{ or } w_0 > 0$ | $Q_{1,3,4}$                                                             | $Q_1$                                                                          |
|                                                              | $\emptyset$                                                             | $\emptyset$                                                                    |
| $\epsilon_{1,3} = -\epsilon_{1,4}, w < 0$                    | $Q_{1,3,4}$                                                             | $Q_1$                                                                          |
| $c_{4,0} > 0, c_{4,1} > 0$                                   | $(\vec{n}_2, -\vec{u}_1, -\vec{u}_2, -\vec{u}_3)$                       | $Q_{1,3,4} \setminus (\vec{v}_1, \vec{v}_2, \vec{v}_3, \vec{n}_2)$             |
| $c_{4,0} < 0, c_{4,1} < 0$                                   | $(\vec{n}_2, \vec{n}_1, -\vec{u}_2, \vec{n}_3)$                         | $Q_{1,3,4}$                                                                    |
| $c_{4,0} < 0, c_{4,1} > 0$                                   | $(\vec{n}_2, \vec{n}_1, -\vec{u}_2, -\vec{u}_3)$                        | $Q_{1,3,4} \setminus (\vec{v}_1, \vec{v}_2, \vec{n}_1, \vec{n}_2)$             |
| $c_{4,0} > 0, c_{4,1} < 0$                                   | $(\vec{n}_2, -\vec{u}_1, -\vec{u}_2, \vec{n}_3)$                        | $Q_{1,3,4}$                                                                    |
| $\epsilon_{1,3} = -\epsilon_{1,4}, w > 0$                    | $Q_{1,3,4}$                                                             | $Q_1$                                                                          |
| $c_{4,0} > 0, c_{4,1} > 0$                                   | $(\vec{n}_2, -\vec{u}_1, \vec{n}_4, -\vec{u}_3)$                        | $Q_{1,3,4} \setminus (-\vec{u}_3, \vec{n}_4, \vec{v}_3, \vec{n}_2)$            |
| $c_{4,0} < 0, c_{4,1} < 0, c_{4,1'} > 0$                     | $(\vec{n}_2, \vec{n}_1, \vec{n}_4, \vec{n}_3)$                          | $Q_{1,3,4} \setminus (\vec{v}_3, -\vec{v}_2, \vec{n}_2, \vec{n}_1, \vec{n}_4)$ |
| $c_{4,0} < 0, c_{4,1} < 0, c_{4,1'} < 0$                     | $(\vec{n}_2, \vec{n}_1, \vec{n}_4, \vec{n}_3)$                          | $Q_{1,3,4} \setminus (\vec{v}_3, -\vec{v}_2, \vec{n}_1, \vec{n}_4)$            |
| $c_{4,0} < 0, c_{4,1} > 0$                                   | $(\vec{n}_2, \vec{n}_1, \vec{n}_4, -\vec{u}_3)$                         | $\emptyset$                                                                    |
| $c_{4,0} > 0, c_{4,1} < 0$                                   | $(\vec{n}_2, -\vec{u}_1, \vec{n}_4, \vec{n}_3)$                         | $Q_{1,3,4}$                                                                    |

**Table 1:** The spherical polygons  $Q_{1,3,4}$  and  $Q_1 = Q_{1,3,4} \setminus Q_{2,4}$ , respectively, are computed by using the above expressions. The expression  $(\vec{w}_1, \dots, \vec{w}_n)$  denotes the spherical polygon defined by the intersection of the great circles with normal vectors  $\vec{w}_1, \dots, \vec{w}_n$  in the counterclockwise orientation (see Definition A.1 in main manuscript). The expressions depend on the conformation of the curve in 3-space, where  $c_{3,1} = (\vec{p}_{3,1} \cdot \vec{n}_1)_{\epsilon_{1,3}}$ ,  $c_{4,1} = (\vec{p}_{4,1} \cdot \vec{n}_1)_{\epsilon_{1,3}}$ ,  $c_{3,0} = (\vec{p}_{3,0} \cdot \vec{n}_3)_{\epsilon_{1,3}}$ ,  $c_{4,0} = (\vec{p}_{4,0} \cdot \vec{n}_3)_{\epsilon_{1,3}}$ ,  $c_{4,1'} = (\vec{p}_{1,4} \cdot (-\vec{v}_2))_{\epsilon_{2,4}}$  and  $w = (\vec{u}_2 \times (-\vec{n}_2)) \cdot (\vec{u}_2 \times \vec{n}_4)$ , where  $\vec{n}_1, \vec{u}_i, \vec{v}_i$  are the normal vectors to the quadrilaterals  $T_{1,3}, T_{1,4}, T_{2,4}$  and where  $\vec{p}_{i,j}$  is the vector that connects vertex  $i$  to vertex  $j$  in 3-space. The areas of  $Q_{4,2,1}$  and  $Q_2$  are obtained from the areas  $Q_{1,3,4}$  and  $Q_1$  of the polygonal curve with reversed orientation (see proof of Theorem 1.1).

$$\begin{aligned}
Q_{2,4} \cap Q_{1,3} &\subset Q_{2,4} \cap Q_{1,4} = Q_{4,2,1} \\
Q_{2,4} \cap Q_{1,3} &\subset Q_1 = Q_{1,3} \cap Q_{1,4} = Q_{1,3,4}
\end{aligned} \tag{13}$$

The probabilities can be expressed as:

$$\begin{aligned}
P(A_1) &= 2|L(e_1, e_3)| - \frac{1}{2\pi}A(Q_{1,3,4}) \\
P(A_2) &= 2|L(e_1, e_3)| - \frac{1}{2\pi}A(Q_{4,2,1}) \\
P(A_3) &= 2|L(e_1, e_4)| - \frac{1}{2\pi}A(Q_{4,2,1} \setminus Q_{1,3}) - A(Q_{1,3,4}) \\
P(C) &= \frac{1}{2\pi}A(Q_{2,4} \cap Q_{1,3,4}) \\
P(B_i) + P(B_{i'}) &= \frac{1}{2\pi}A(Q_{1,3,4} \setminus Q_{2,4}) \\
P(B_{ii}) + P(B_{ii'}) &= \frac{1}{2\pi}A(Q_{4,2,1} \setminus Q_{1,3})
\end{aligned}$$

From all these equations, and using the notation  $Q_1 = Q_{1,3,4} \setminus Q_{2,4}$  and  $Q_2 = Q_{4,2,1} \setminus Q_{1,3}$ , we obtain the expressions of the statement of the Theorem.

We proceed with finding finite forms for  $Q_{1,3,4}$  and  $Q_1$  from which the finite forms of  $Q_{4,2,1}$  and  $Q_2$  are also derived.

*Finite form of  $Q_{1,3,4}$*

The finite form of  $Q_{1,3,4}$  is found by Theorem A.1 (in main manuscript) for  $i = 0, j = 2$ .

*Finite form of  $Q_{4,2,1}$ :*

For the finite form of  $Q_{4,2,1}$  we think as follows: Let  $R(E_4)$  to denote the polygonal curve  $E_4$  with reversed numbering of vertices. Let us denote its edges  $e'_1, e'_2, e'_3, e'_4$ . Then  $Q_{4,2,1} = Q_{1',3',4'}$ . This can be obtained from table 1 determined by the algorithm described in Section 2(a)(i) for  $n_i', u_i'$  which are related to the normal vectors of  $E_4$  as follows:  $\vec{n}_1' = -\vec{v}_2$ ,  $\vec{n}_2' = -\vec{v}_1$ ,  $\vec{n}_3' = -\vec{v}_4$ ,  $\vec{n}_4' = -\vec{v}_3$ ,  $\vec{u}_1' = -\vec{u}_2$ ,  $\vec{u}_2' = -\vec{u}_1$ ,  $\vec{u}_3' = -\vec{u}_4$ ,  $\vec{u}_4' = -\vec{u}_3$ . Accordingly,  $w' = (\vec{u}_1 \times \vec{v}_1) \cdot (\vec{u}_1 \times (-\vec{v}_3))$ ,  $w_0' = (\vec{n}_4 \times \vec{v}_2) \cdot (\vec{n}_4 \times \vec{n}_3)$ ,  $\epsilon_{1',3'} = \epsilon_{2,4}$  and  $\epsilon_{1',4'} = \epsilon_{1,4}$ . Finally,  $c_{3',1'} = (\vec{p}_{3',1'} \cdot \vec{n}_1')\epsilon_{1',3'} = (\vec{p}_{1,3} \cdot (-\vec{v}_2))\epsilon_{2,4}$ , otherwise  $c_{4',1'} = (\vec{p}_{4',1'} \cdot \vec{n}_1')\epsilon_{1',3'} = (\vec{p}_{1,4} \cdot (-\vec{v}_2))\epsilon_{2,4}$ ,  $c_{3',0'} = (\vec{p}_{3',0'} \cdot \vec{n}_3')\epsilon_{1',3'} = (\vec{p}_{1,4} \cdot (-\vec{v}_4))\epsilon_{2,4}$ , otherwise  $c_{4',0'} = (\vec{p}_{4',0'} \cdot \vec{n}_3')\epsilon_{1',3'} = (\vec{p}_{0,4} \cdot (-\vec{v}_4))\epsilon_{2,4}$ , when  $\epsilon_{1',3'} = \epsilon_{1',4'}$  and  $c_{4',0'} = (\vec{p}_{4',0'} \cdot \vec{n}_1')\epsilon_{1',3'} = (\vec{p}_{0,4} \cdot (-\vec{v}_2))\epsilon_{2,4}$ , otherwise  $c_{4',1'} = (\vec{p}_{4',1'} \cdot \vec{n}_3')\epsilon_{1',3'} = (\vec{p}_{0,3} \cdot (-\vec{v}_4))\epsilon_{2,4}$ , when  $\epsilon_{1',3'} = -\epsilon_{1',4'}$ .

*Finite form of  $Q_1$*

- Case  $\epsilon_{1,4} = \epsilon_{1,3} = -\epsilon_{2,4}$ : One can derive from the proof of Theorem A.2 (in main manuscript) the area of  $Q_{1,3,4} \setminus Q_{2,4}$ . The area will be  $Q_1 = Q \cup (\vec{n}_4, -\vec{v}_3, -\vec{u}_2, x)$ , where  $x$  is equal to  $-\vec{u}_1$  or  $\vec{n}_3$  or  $\vec{n}_3, -\vec{u}_1$  or  $-\vec{u}_1, \vec{n}_3$ , depending on the signs of  $c_{0,3}, c_{0,4}$  (see Table 1).

Next, we consider the case  $\epsilon_{1,4} = -\epsilon_{1,3}$  and refer to Figure 1 as an illustrative example. Since  $\vec{u}_3 = -\vec{v}_1$  and  $\vec{n}_3 = \vec{v}_4$ , these spherical edges (which bound  $Q_{2,4}$ ) do not cross the interior of  $Q_{1,3,4}$ . In order to find  $Q_1 = Q_{1,3,4} \setminus Q_{2,4}$ , we examine if and how  $\vec{v}_2$  and  $\vec{v}_3$  intersect the interior of  $Q_{1,3,4}$ . Figure 1 shows the relative positions of  $\vec{v}_1, \vec{v}_4, \vec{v}_2$  determined by the connectivity of the polygonal curve and the orientations of  $\vec{v}_1, \vec{v}_4$  are also given by the known orientations of  $\vec{u}_3$  and  $\vec{n}_3$ .

- Case  $\epsilon_{1,4} = -\epsilon_{1,3} = \epsilon_{2,4}$ : (This is the case where  $c_{4,1} < 0$  in Table 1). This corresponds to the case where  $\epsilon_{1',4'} = \epsilon_{1',3'}$  for the reversed walk. First of all, in this case, we notice that when  $c_{4,0} > 0$ , then  $w' > 0$  and, similarly, when  $w < 0$  then  $w_0' > 0$ , thus in these cases  $Q_{4,2,1} = \emptyset$ , giving  $Q_1 = Q_{1,3,4}$ . Thus, the only case that might give  $Q_{2,4} \cap Q_{1,3,4} \neq \emptyset$  is the case  $w > 0, c_{4,0} < 0$ , equivalently,  $w > 0, w_0 < 0$ , (see Figure 1). In that case the great circle with normal vector  $\vec{v}_3$  intersects the interior of  $Q_{1,3,4}$  (since the face with normal vector  $\vec{v}_3$  is in-between the faces with normal vectors  $\vec{n}_1, \vec{n}_3$ ). To examine the intersection of  $Q_{2,4} \cap Q_{1,3,4}$ , we examine the reversed oriented polygon,  $R(E_4)$  (see previous paragraph). The above conditions correspond to the case where  $\epsilon_{1',3'} = \epsilon_{1',4'}$ ,  $w' < 0, w_0' < 0$ , which is the case that can give the non-trivial knotoid. Thus, using Theorem ??, we derive that for  $w' < 0$ , if  $c_{4',1'} > 0$ , then  $Q_1 = Q_{1,3,4} \setminus (v_3, -v_2, n_2, n_1, n_4)$  and if  $c_{4',1'} < 0$ , then  $Q_1 = Q_{1,3,4} \setminus (v_3, -v_2, n_1, n_4)$ .

- Case  $\epsilon_{1,4} = -\epsilon_{1,3} = -\epsilon_{2,4}$ : (This is the case where  $c_{4,1} > 0$  in Table 1) As in the previous case, in order to find  $Q_1 = Q_{1,3,4} \setminus Q_{2,4}$ , we need the area of  $Q_{1,3,4}$  that is determined by the great circles  $\vec{v}_2$  and  $\vec{v}_3$ . To find these intersections, we will examine  $Q_{4,2,1}$  using the reverse walk with  $\epsilon_{1',3'} = -\epsilon_{1',4'}$ , and we notice that in all cases,  $c_{1',4'} = (p_{4',1'} \cdot \vec{n}_3')\epsilon_{1',3'} = (p_{0,3} \cdot (-\vec{v}_4))\epsilon_{2,4} = (p_{0,3} \cdot (-\vec{n}_3))\epsilon_{1,3} > 0$ . Indeed, since  $\vec{n}_3$  is the normal vector to the face defined by the vertices 1,2,3, of the tetrahedron  $T_{1,4}$  and points inwards if  $\epsilon_{1,3} > 0$  (in the direction of vertex 3) or outwards otherwise. Thus  $c_{1',4'} > 0$  in all cases. Thus, the intersection will depend on the sign of  $c_{0',4'} = (p_{4',0'} \cdot \vec{n}_1')\epsilon_{1',3'} = (p_{0,4} \cdot (-\vec{v}_2))\epsilon_{2,4}$ . This sign will depend on the sign of  $c_{4,0} = (\vec{p}_{4,0} \cdot \vec{n}_1)\epsilon_{1,3}$  and the sign of  $w$ , which determines if  $\vec{u}_2$  lies between  $\vec{n}_2, \vec{n}_4$ .

If  $c_{4,0} < 0$  then  $w' < 0$  since we can verify that the face with normal vector  $\vec{u}_1$  is between the faces with normal vectors  $\vec{v}_1, \vec{v}_3$ , and  $w' > 0$  if  $c_{4,0} > 0$ . If  $w < 0$  then  $c_{0',4'} = (p_{4',0'} \cdot \vec{n}_1')\epsilon_{1',3'} = (p_{0,4} \cdot (-\vec{v}_2))\epsilon_{2,4} < 0$  since  $\vec{v}_2$  points in the opposite direction of the region that contains the vertex 0 when  $\epsilon_{2,4} < 0$ , and  $c_{0',4'} > 0$  if  $w > 0$ .

Thus, by using Table 1 for the reversed walk we find that if  $c_{4,0} < 0$  and  $w < 0$ , then  $Q_1 = Q_{1,3,4} \setminus (v_1, v_2, n_1, n_2)$ . If  $c_{4,0} < 0$  and  $w > 0$ , then  $Q_1 = \emptyset$ . If  $c_{4,0} > 0$  and  $w < 0$ , then  $Q_1 = Q_{1,3,4} \setminus (v_1, v_2, v_3, n_2)$ . If  $c_{4,0} > 0$  and  $w > 0$ , then  $Q_1 = Q_{1,3,4} \setminus (v_1, n_4, v_3, n_2)$ .

*Finite form of  $Q_2$ :*

For the finite form of  $Q_2$  we think as follows: Let  $R(E_4)$  to denote the polygonal curve  $E_4$  with reversed numbering of vertices as described in the Finite form of  $Q_{4,2,1}$ . Then  $Q_2 = Q_{4,2,1} \setminus Q_{1,3} = Q_{1',3',4'} \setminus Q_{2',4'} = Q_1'$ , which is found earlier.

□

**Example:** (continuation of Example in main manuscript) Figure 2 shows the Kauffman bracket polynomial of the open 3-dimensional curve in time and that of the standard diagram of the knotoid k2.1. We see the bracket polynomial of the open curve vary continuously in time, tending to that of the diagram, due to the tightening of the configuration to become almost planar.

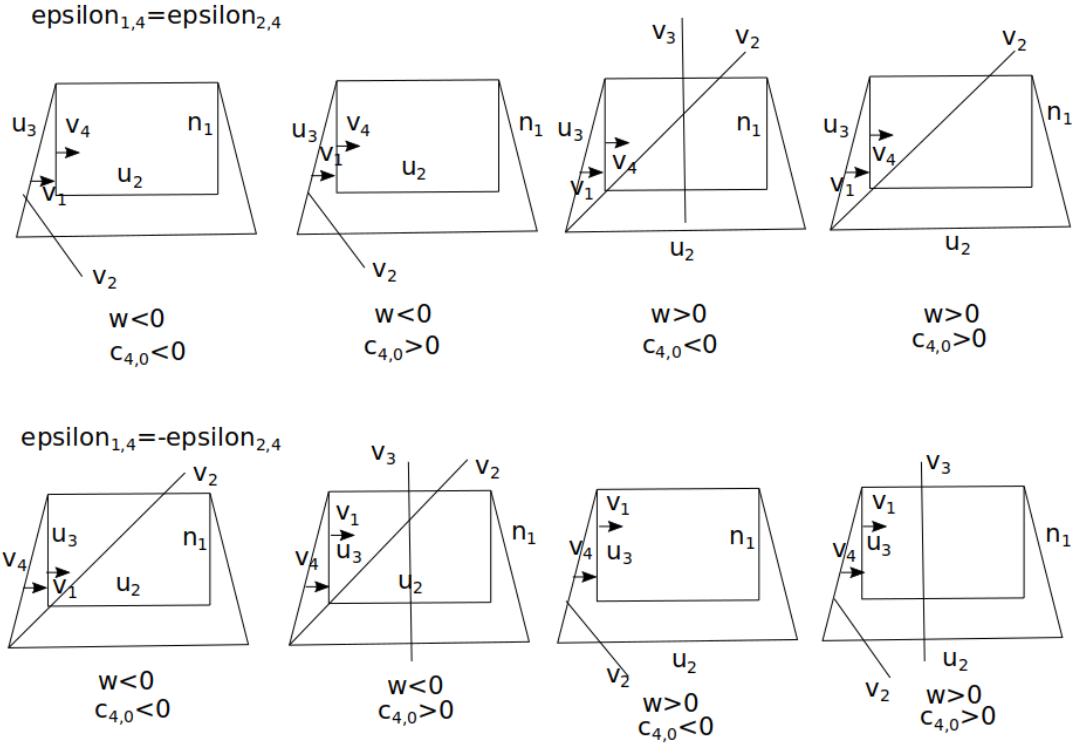

**Figure 1:** Representation of  $Q_{1,3,4}$  when  $\epsilon_{1,3} = \epsilon_{2,4}$ . In this case, one great circle of the boundary of  $Q_{1,3,4}$  is the one with normal vector  $\vec{n}_2$  (top boundary in the figure). The lower great circle (bottom boundary) is  $\vec{u}_2$  or  $\vec{n}_4$ , depending on whether  $\epsilon_{1,4} = \epsilon_{2,4}$  or not (equivalently, depending on the sign of  $c_{1,4}$ ). Similar considerations define the other boundaries, where  $c_{4,0} = (\vec{p}_{4,0} \cdot \vec{n}_1)\epsilon_{1,3}$ ,  $w = (\vec{u}_2 \times (-\vec{n}_2)) \cdot (\vec{u}_2 \times \vec{n}_4)$ ,  $\vec{n}_3 = \vec{v}_4$  and  $\vec{u}_3 = -\vec{v}_1$ . To determine  $Q_1 = Q_{1,3,4} \setminus Q_{2,4}$ , we examine how  $\vec{v}_2$  and  $\vec{v}_3$  intersect  $Q_{1,3,4}$  (see proof of Theorem 1.1). The results are shown in Table 1.



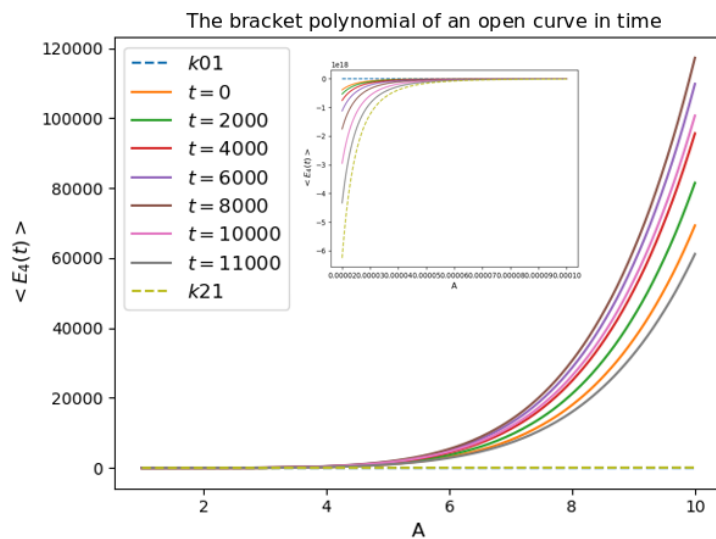

**Figure 2:** The Kauffman bracket polynomial of an open polygonal curve as it moves in time. The inset plot shows the polynomial for values of the parameter  $A$  less than 1.
